# Supplementary material for: Moderate Hypoxia Induces β-Cell Dysfunction with HIF-1–Independent Gene Expression Changes
Source: PubMed Central journal article supplement (PMC4264765; doi:10.1371/journal.pone.0114868), 2014-12-12
Supplement: pone.0114868.s004.pdf [file pone.0114868.s004.pdf]

**Table S1**

## Primer sequences for qPCR analysis (1)

| Gene name | Forward                 | Reverse                |
|-----------|-------------------------|------------------------|
| Slc2a1    | GCTTATGGGCTTCTCCAAACT   | GGTGACACCTCTCCCACATAC  |
| Hk1       | TGCCTCTGGGCTTCACCTTC    | CCACACAGTCGGTGGCTTTG   |
| Gpi       | CAAGACGCCCTGGAGAAGA     | TCCATGTACCCTGCTGGAA    |
| Pfk       | ATGGCTACCGTGGACCTGGA    | CACAGCCCTGACAGCAGCAT   |
| Pgk1      | GGGTCGTGATGAGGGTGGAC    | CTGGGCCACACAATCCTTC    |
| Pgm       | ATGCTGACAGGCTCGCTGTG    | CCGAGCTGTTGGGCTCTGTT   |
| Pkm2      | TTGTGCGAGCCTCCAGTC      | ACTCCGTGAGAACTATCAAAGC |
| Ldha      | ATGGCAACCCTCAAGGACCA    | GAGGCTGCCATGCTGGAGAT   |
| Pdk1      | GGACTTCGGGTCAGTGAATGC   | TCCTGAGAAGATTGTCGGGGA  |
| Ndufa5    | GTC AAGGCGGAGCCAGATGT   | TTAGCAGGCGGCTCTTCCAC   |
| Ndufa9    | GCAGCCGGTGTATGTTGCAG    | AGGTACCGGTTTGGCCAGT    |
| Ndufs3    | CCTGCTGICTCTGCGGTTCA    | TGCCAGCTCCACTGGTTCAG   |
| Sdha      | TGTGCGCACTGCAGACCATA    | CCTCCAGTGTTCCCCAAACG   |
| Sdhb      | CCAGGAGGGCAAGCAACAGT    | AGTAGCTGGGGCAGCTGGTG   |
| Uqcrc1    | GCGGGAGATGCAGGAAAATG    | CCTCCACAGCCTGGGCTAGA   |
| Uqcrb     | GGGCCGATCTGCTGTTTCAG    | GGTCCAGGGCTCTCTTAATTCG |
| CytC      | TCCATCAGGGTATCCTCTCC    | GGAGGCAAGCATAAGACTGG   |
| Cox4-1    | TGGGTGGCCATGCAGACCAAGCG | CCGGCAGGCAGCGGGCTCTC   |
| Atp5a1    | GGAGGAGACTGGGCGTGTGT    | GCATTACCGAGGGCGTCAAC   |
| Atp6v1h   | CCGGGGAAAACGGGTTATTG    | CCGAGCAGCAGCAGTCTGAG   |
| Mafa      | CAGCAGCGGCACATTCTG      | GCCCGCAACTTCTCGTAT     |
| Pdx1      | AAGCTCGCTGGGATCACTGG    | GGAAGGTGGTGGTGGAGGTG   |
| Foxa2     | GCCAGTAGCGGAGGCAAGAA    | CACCTCGCTTGTGCTCCTGA   |
| Neurod1   | TCCCACGTCTTCCACGTCAA    | TTTCAAACCTCGGCGGATGGT  |
| Hnf1a     | AAGAGCCCACAGGCGATGAG    | TGGATGCACTCCGCCCTATT   |
| Nkx2.2    | CTTGGTCAGGGACGGCAAAC    | GGTGCTGGCCGAGCTGTACT   |
| Hnf4a     | GCCACAGTTTTCCACCAAGAG   | AAGGAGGACGTCTGCTTCTGA  |
| Hnf1b     | CTGGACCCAGGCCACAGTCT    | GTAGGGCTGCCAGGCTGCTA   |
| Foxo1     | CATCTGCCATGAACCGCTTG    | TGGTGGAGGACACCCATCCT   |
| Hnf6      | AGTCGGGTCGGGAGACCTTC    | TTTGGGGGTGTTGCCTCTGT   |
| Tcf7l2    | GGCGCTAACGACGAGCTGAT    | CTCTTGGCCGCTTCTTCCAA   |
| Slc2a2    | CGTCCTACGGCTCTGGCACT    | CACCCCAGCGAAGAGGAAGA   |
| Kenj11    | CTGTCCCGAAAGGGCATTAT    | CGTTGCAGTTGCCTTTCTTG   |
| Ins1      | ACCCACCCAGGCTTTTGTC A   | GGCGGGACTTGGGTGTGTAG   |
| Wfs1      | ACGAAGTGCTGGGGAAGCAG    | GGGTCTCCAGCCTTGGCTTT   |

# Table S1

## Primer sequences for qPCR analysis (2)

| Gene name | Forward                  | Reverse                 |
|-----------|--------------------------|-------------------------|
| Glp1r     | TGAAGAGCCGCATCTTGCTG     | CTCCGTTGAGTGGTGCGATG    |
| Irs1      | CCAGCTCCACCCAGCTCCTA     | TGCCCAACTCAACTCCACCA    |
| Abcc8     | TCAACTTGCTCTGGTGGTCAGC   | GAGCTGAGAAAGGGTCATCCA   |
| Cacna1d   | GGGGTCCAGCTGTTCAAGGGGGAA | GCATGATGAGGACGAACATCATG |
| Irs2      | CAGGAGCAGGAGGGCTGGTA     | GGAGAGAGGCGCTGCAAGAG    |
| Ins2      | CTGGCCCTGCTCTTCCTCTG     | ACAATGCCACGCTTCTGCTG    |
| Cacna1c   | CAGGAGGTGATGGAGAAGCCA    | CTGCAGGCGGAACCTGTTGTT   |
| Cdkal1    | TTGGCACAGATCTCCCCACA     | TTGAAGTCGGCCACGCAGTA    |
| Gck       | ACAAGGAGGGGAGCCCAGTC     | CCCCACTTTCACCAGCATC     |
| Slc30a8   | AGGTGGTGGGTGGACACGTT     | AAAAGGCGCTCACAGGCAAG    |
| Igf1r     | GGCATGGCCTACCTCAATGC     | AGAGGACGACCCCGAAGGAC    |
| Insr      | GTGTACGTGCCGGACGAGTG     | ACACGGGTCTCTGCCTCACC    |
| Iapp      | GCCAGCTGTCCTCCTCATCC     | CCGTGTTGCACTTCCGTTTG    |
| Gipr      | GATGGCCAGTGGGGATCTTG     | CAGCAGCTGATCTCGGGTGA    |
| Chop      | ATATCTCATCCCCAGGAAACG    | TCTTCCTTGCTCTTCCTCCTC   |
| Tbp       | CCCCTTGTAACCCTTACCAAT    | GAAGCTGCGGTACAATTCCAG   |
